# Supplementary material for: Achieving electroreduction of CO2to CH3OH with high selectivity using a pyrite–nickel sulfide nanocomposite
Source: Royal Society of Chemistry journal article supplement (doi:10.1039/c6ra26868d), 2017-01-01
Supplement: c6ra26868d1.pdf [file c6ra26868d1.pdf]

**Achieving electroreduction of CO<sub>2</sub> to CH<sub>3</sub>OH with high selectivity by  
pyrite-nickel sulfide nanocomposite**

**Supporting information**

*Siqi Zhao, Sijie Guo, Cheng Zhu, Jin Gao, Hao Li, Hui Huang\*, Yang Liu\*, Zhenhui Kang\**

Jiangsu Key Laboratory for Carbon-Based Functional Materials & Devices, Institute of Functional Nano & Soft Materials (FUNSOM), Soochow University, 199 Ren'ai Road, Suzhou, 215123, Jiangsu, PR China. E-mail: [zhkang@suda.edu.cn](mailto:zhkang@suda.edu.cn); Tel: +86 512 65880957

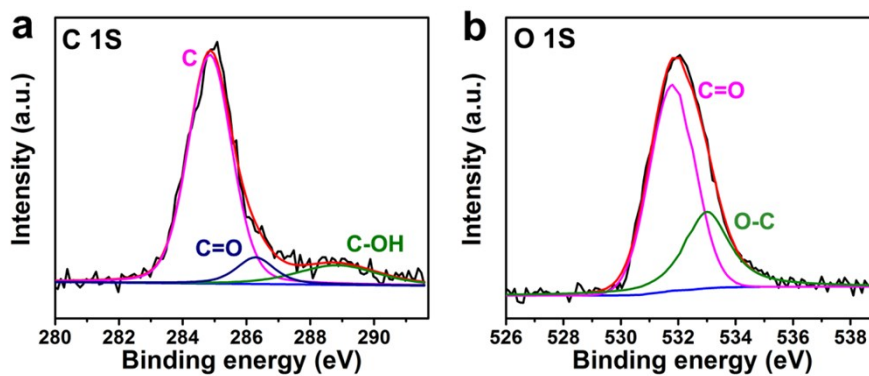

Figure S1. The high-resolution XPS spectra of (a) C 1s and (b) O 1s.

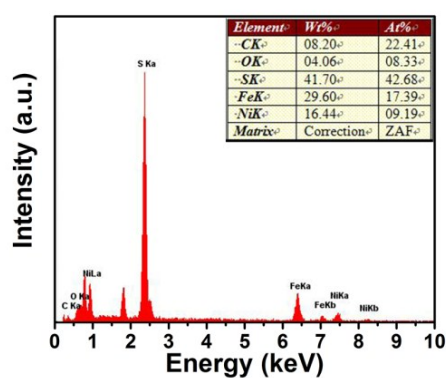

Figure S2. The EDX spectrum of FeS<sub>2</sub>/NiS nanocomposite.

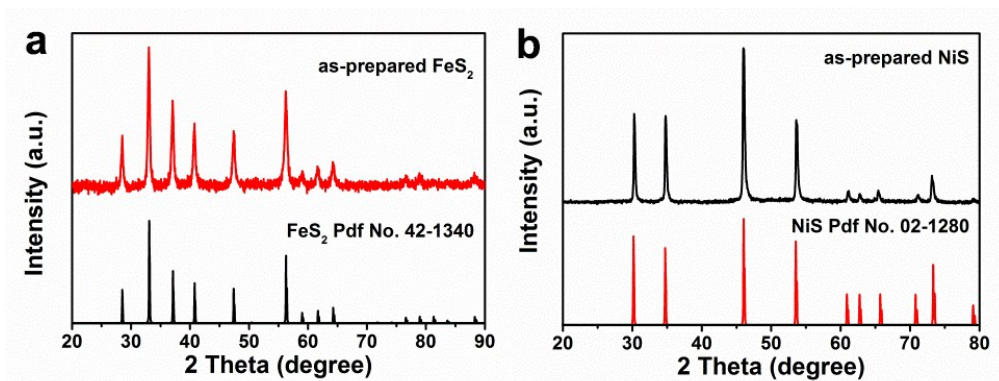

Figure S3. The large-angle XRD patterns of (a) FeS<sub>2</sub> and (b) NiS nanocrystals.

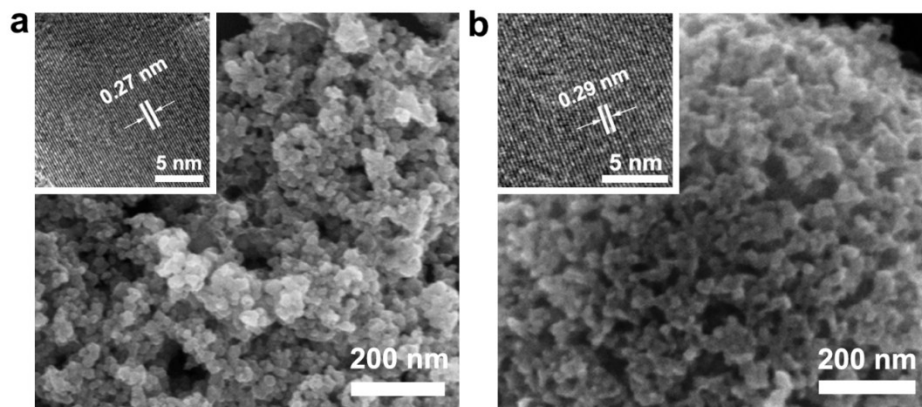

**Figure S4.** (a) The SEM image of FeS<sub>2</sub> nanocrystals and the HRTEM image of FeS<sub>2</sub> nanocrystals (inset). (b) The SEM image of NiS nanocrystals and the HRTEM image of NiS nanocrystals (inset).

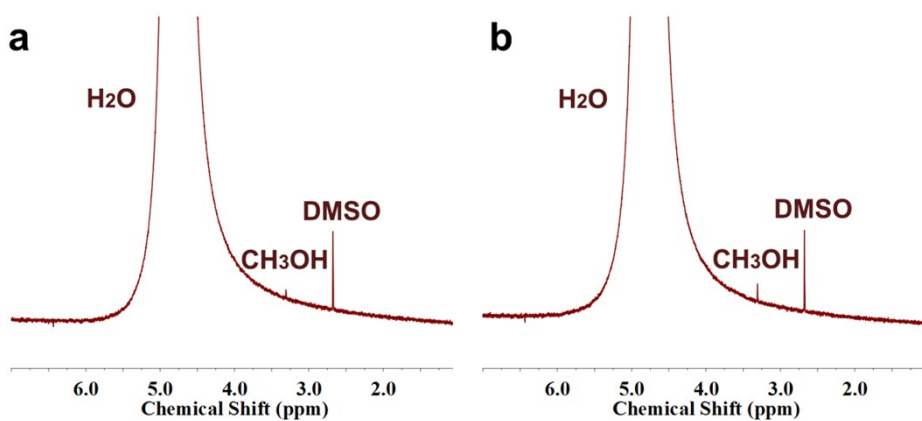

**Figure S5.** <sup>1</sup>H-NMR spectra of the electrolytes after (a) 2 h and (b) 4 h CO<sub>2</sub> electroreduction at -0.6 V vs. RHE for the FeS<sub>2</sub>/NiS nanocomposite.

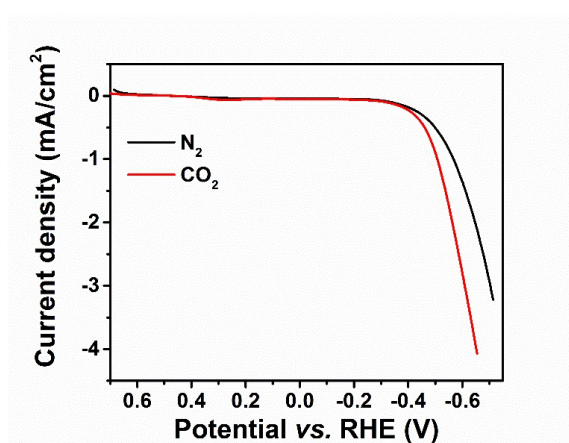

**Figure S6.** LSVs for physical mixture of FeS<sub>2</sub> and NiS nanocrystals in 0.5 M KHCO<sub>3</sub> aqueous solution under N<sub>2</sub> (blue trace) and CO<sub>2</sub> (red trace) atmosphere.

**Table S1.** Summary of electrode/electrocatalysts for selectively reducing CO<sub>2</sub> to CH<sub>3</sub>OH.

| No. | Electrode/electrocatalysts                                                          | Electrode Potential (V) | Faradaic Efficiency (%) | Ref.      |
|-----|-------------------------------------------------------------------------------------|-------------------------|-------------------------|-----------|
| 1   | FeS <sub>2</sub> /NiS nanocomposite                                                 | -1.3 V vs. SCE          | 64                      | This work |
| 2   | Ru                                                                                  | -0.54 V vs. SCE         | 42                      | 1         |
| 3   | Ru/Cu                                                                               | -0.8 V vs. SCE          | 41.3                    | 2         |
| 4   | Cu                                                                                  | -1.1 vs. SCE            | 40                      | 3         |
| 5   | RuO <sub>2</sub> -TiO <sub>2</sub>                                                  | -0.95 vs. SCE           | 30                      | 4         |
| 6   | Platinum plate electrode<br>KFe <sup>II</sup> [Fe <sup>II</sup> (CN) <sub>6</sub> ] |                         | >80                     | 5         |
| 7   | Electrodeposited cuprous oxide film                                                 | -1.1 vs. SCE            | 38                      | 6         |
| 8   | RuO <sub>2</sub> -TiO <sub>2</sub> nanotube (NT) composite electrodes               |                         | 60.5                    | 7         |
| 9   | p-GaP                                                                               | -1.4 V vs. SCE          | 60                      | 8         |
| 10  | p-InP                                                                               |                         | 70                      | 9         |
| 11  | p-GaAs                                                                              | -1.3 V vs. SCE          | 55                      | 9         |

**Reference:**

1. K. W. Frese and S. Leach, *J. Electrochem. Soc.*, 1985, 132, 259–260.
2. J. P. Popic, M. L. Avramovic and N. B. Vukovic, *J. Electroanal. Chem.*, 1997, 421, 105–110.
3. J. W. Li and G. Prentice, *J. Electrochem. Soc.*, 1997, 144, 4284–4288.
4. A. Bandi and H. M. Kühne, *J. Electrochem. Soc.*, 1992, 139, 1605–1610.
5. K. Ogura and H. Uchida, *J. Electroanal. Chem.*, 1987, 220, 333–337.
6. M. Le, M. Ren, Z. Zhang, P. T. Sprunger, R. L. Kurtz and J. C. Flake, *J. Electrochem. Soc.*, 2011, 158, E45–E49.
7. J. P. Qu, X. G. Zhang, Y. G. Wang and C. X. Xie, *Electrochim. Acta*, 2005, 50, 3576–3580.
8. M. Halmann, *Nature*, 1978, 275, 115–116.
9. B. A. Parkinson and P. F. Weaver, *Nature*, 1984, 309, 148–149.
